# Supplementary material
Source: Springer Nature journal article supplement (https://www.springermedizin.de/resource/supplementary/12943_2013_1482_MOESM12_ESM.pdf/9553114)

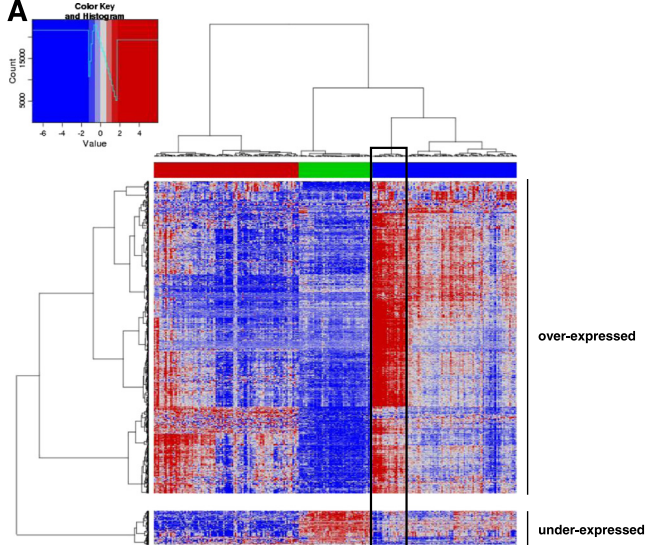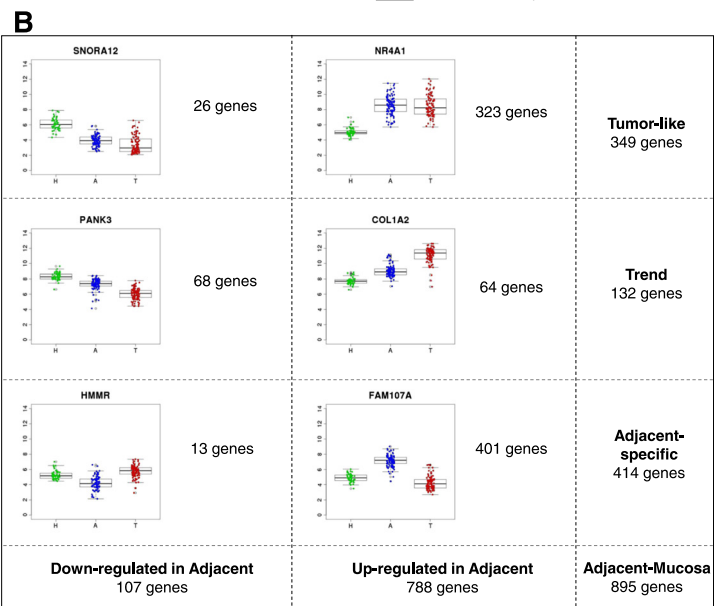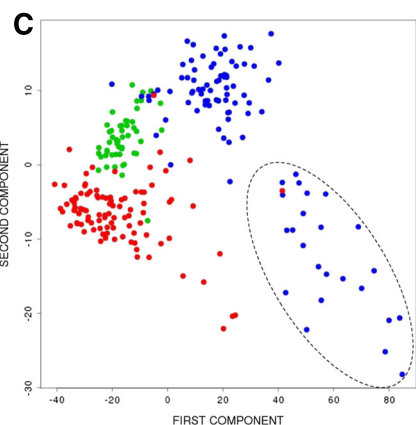

Supplement: MOESM12 [file 9553114]
